# Supplementary material
Source: Springer Nature journal article supplement (https://www.springermedizin.de/resource/supplementary/12888_2008_520_MOESM1_ESM.pdf/9483488)

# Categorical Weight Change

Numbers of Patients

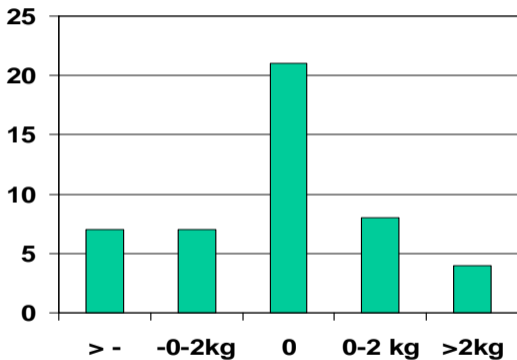

*Weight Loss*

*Weight Gain*

**Weight change**

Supplement: MOESM1 [file 9483488]
